# Supplementary material for: Photoelectrochemical-driven nitrogen reduction to ammonia by a Vo-SnO2/TiO2 composite electrode
Source: Royal Society of Chemistry journal article supplement (doi:10.1039/d4nr00060a), 2024-01-01
Supplement: d4nr00060a1.pdf [file d4nr00060a1.pdf]

## Supporting information

### **Photoelectrochemical-driven nitrogen reduction to ammonia by V<sub>o</sub>-SnO<sub>2</sub>/TiO<sub>2</sub> composite electrode**

Junbo Ma, Jiangjian Fu, Lan Sun\*, Jun Cheng\*, Jian-Feng Li\*

<sup>1</sup>State Key Laboratory for Physical Chemistry of Solid Surfaces, Department of Chemistry,

College of Chemistry and Chemical Engineering, Xiamen University, Xiamen 361005, China

\*Emails: sunlan@xmu.edu.cn (L. Sun); chengjun@xmu.edu.cn (J. Cheng);

Li@xmu.edu.cn (J.-F. Li).

**Table. S1** Resistance and CPE values of the corresponding models for the sample of TiO<sub>2</sub> SnO<sub>2</sub>/TiO<sub>2</sub> and V<sub>o</sub>-SnO<sub>2</sub>/TiO<sub>2</sub> nanorod arrays at different solvothermal times.

| Catalysts                                             | $R_s(\Omega)$ | CPE1                  |          | $R_1(\Omega)$ | CPE2                  |              | $R_{ct}(\Omega)$ |
|-------------------------------------------------------|---------------|-----------------------|----------|---------------|-----------------------|--------------|------------------|
|                                                       |               | $Q_1(F)$              | $n_1(F)$ |               | $Q_2(F)$              | $n_2(\mu F)$ |                  |
| TiO <sub>2</sub>                                      | 31.32         | 1.03*10 <sup>-5</sup> | 0.84     | 130.08        | 1.36*10 <sup>-4</sup> | 0.68         | 5370             |
| SnO <sub>2</sub> -8/TiO <sub>2</sub>                  | 30.26         | 3.41*10 <sup>-4</sup> | 0.80     | 35.52         | 2.61*10 <sup>-4</sup> | 0.80         | 4130             |
| SnO <sub>2</sub> -16/TiO <sub>2</sub>                 | 31.61         | 1.55*10 <sup>-4</sup> | 0.85     | 93.11         | 1.94*10 <sup>-4</sup> | 0.68         | 3171             |
| SnO <sub>2</sub> -24/TiO <sub>2</sub>                 | 31.11         | 2.85*10 <sup>-4</sup> | 0.84     | 88.78         | 2.72*10 <sup>-4</sup> | 0.73         | 3683             |
| V <sub>o</sub> -SnO <sub>2</sub> -8/TiO <sub>2</sub>  | 30.7          | 2.51*10 <sup>-4</sup> | 0.70     | 2753          | 3.15*10 <sup>-5</sup> | 0.83         | 2631             |
| V <sub>o</sub> -SnO <sub>2</sub> -16/TiO <sub>2</sub> | 29.36         | 4.51*10 <sup>-4</sup> | 0.73     | 3927          | 3.81*10 <sup>-5</sup> | 0.68         | 1321             |
| V <sub>o</sub> -SnO <sub>2</sub> -24/TiO <sub>2</sub> | 33.44         | 1.41*10 <sup>-3</sup> | 0.39     | 3362          | 3.32*10 <sup>-3</sup> | 1.00         | 1872             |

**Table. S2** Comparison of the catalytic performance of V<sub>o</sub>-SnO<sub>2</sub>-16/TiO<sub>2</sub> with other PEC and PC nitrogen fixing catalysts

| Photoelectro-catalysts                                | Light Source                           | Electrolyte                                                         | NH <sub>3</sub> Yield (μg·cm <sup>-2</sup> h <sup>-1</sup> ) | Faraday efficiency | References |
|-------------------------------------------------------|----------------------------------------|---------------------------------------------------------------------|--------------------------------------------------------------|--------------------|------------|
| V <sub>o</sub> -SnO <sub>2</sub> -16/TiO <sub>2</sub> | 300 W Xe lamp, 100 mW cm <sup>-2</sup> | N <sub>2</sub> -saturated 0.1 M Na <sub>2</sub> SO <sub>4</sub>     | 19.41                                                        | 59.6               | This work  |
| Bi <sub>2</sub> S <sub>3</sub> /MoS <sub>2</sub>      | 300 W Xe lamp,                         | N <sub>2</sub> -saturated 0.1 M Na <sub>2</sub> SO <sub>4</sub>     | 18.5                                                         | 33.2               | [1]        |
| SnO <sub>2</sub> /MoS <sub>2</sub>                    | 100 mW cm <sup>-2</sup>                | N <sub>2</sub> -saturated 0.1 M Na <sub>2</sub> SO <sub>4</sub>     | 19.6                                                         | 40.3               | [2]        |
| BiOI-O <sub>v</sub>                                   | 100 mW cm <sup>-2</sup>                | N <sub>2</sub> -saturated H <sub>2</sub> O                          | 2.38                                                         | /                  | [3]        |
| Ag/black Si                                           | 300 W Xe lamp, 100 mW cm <sup>-2</sup> | N <sub>2</sub> -saturated 0.1 M Na <sub>2</sub> SO <sub>4</sub>     | 48.79                                                        | 40.6               | [4]        |
| Au/black Si                                           | 300 W Xe lamp,                         | N <sub>2</sub> -saturated 150 p.p.m Na <sub>2</sub> SO <sub>4</sub> | 1.33                                                         |                    | [5]        |
| TiO <sub>2</sub> /Au/a-TiO <sub>2</sub>               | 300 W Xe lamp 100 mW cm <sup>-2</sup>  | N <sub>2</sub> -saturated H <sub>2</sub> O                          | 0.228                                                        | /                  | [6]        |
| O <sub>v</sub> -TiO <sub>2</sub>                      | 400 W Hg lamp                          | N <sub>2</sub> -saturated H <sub>2</sub> O                          | 0.189                                                        |                    | [7]        |

RT: room temperature; AP: atmospheric pressure

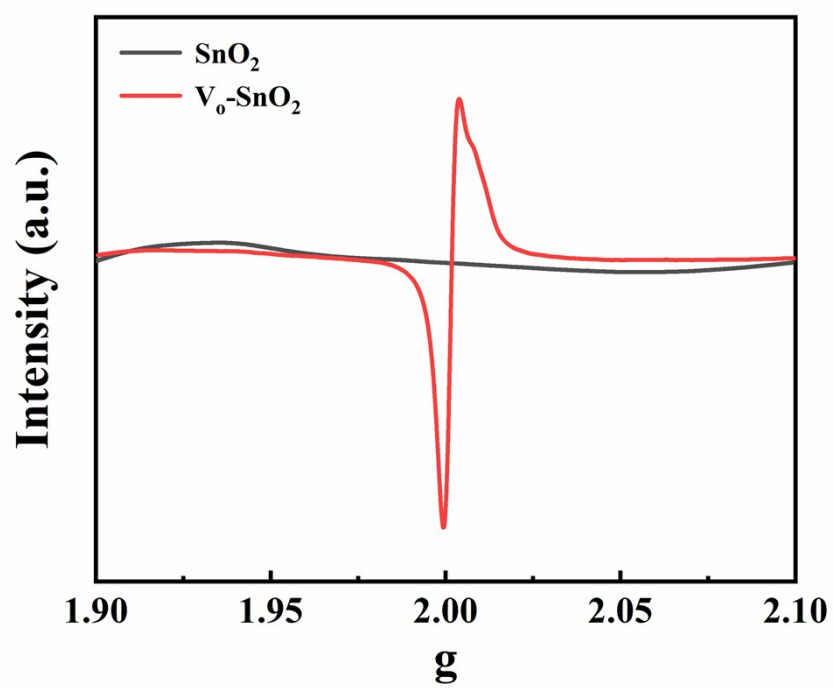

**Fig. S1** EPR spectrum of SnO<sub>2</sub> quantum dot before and after high temperature annealing at low temperature of 90 K.

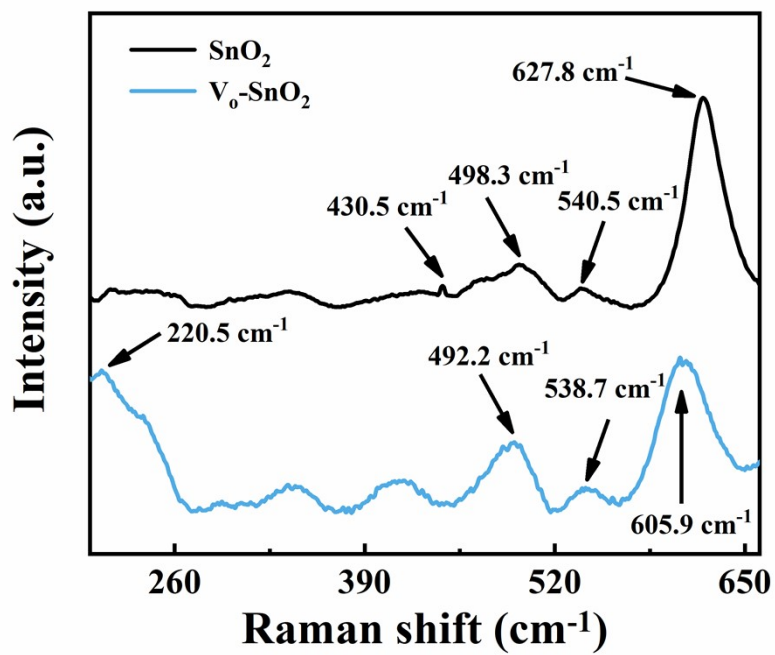

Fig. S2 Raman spectra of SnO<sub>2</sub> and V<sub>0</sub>-SnO<sub>2</sub>.

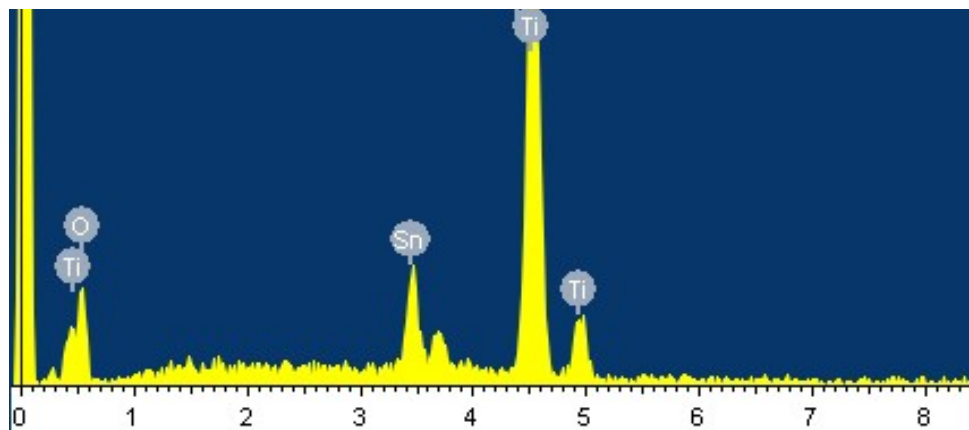

**Fig. S3** EDX spectrum of  $V_0\text{-SnO}_2\text{-16/TiO}_2$ .

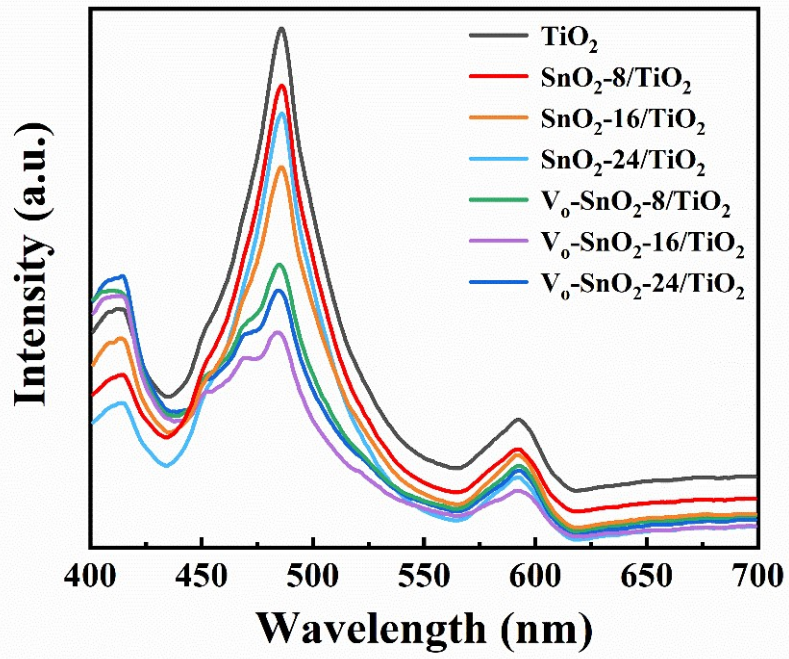

Fig. S4 Room-temperature steady-state PL spectrum of TiO<sub>2</sub>, SnO<sub>2</sub>/TiO<sub>2</sub> and V<sub>0</sub>-SnO<sub>2</sub>/TiO<sub>2</sub>.

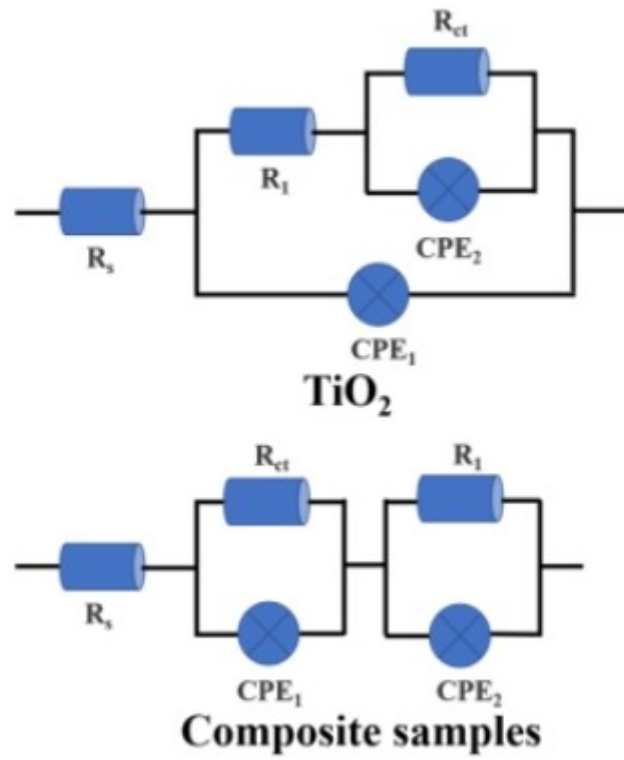

**Fig. S5** Analog circuit diagram of TiO<sub>2</sub> and composite samples.



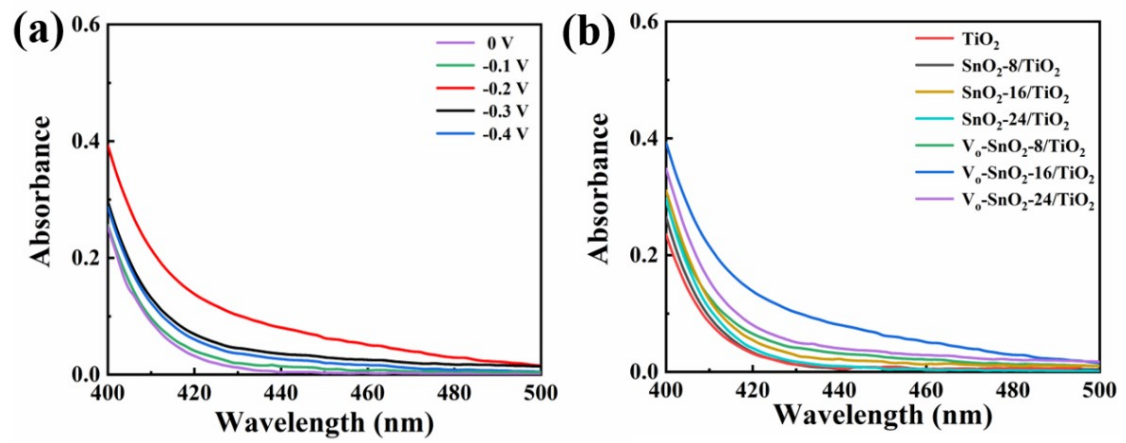

**Fig. S6** Ultraviolet-visible absorption spectra of (a)  $V_o$ - $SnO_2$ -16/ $TiO_2$  at different potentials and (b)  $TiO_2$ ,  $SnO_2$ / $TiO_2$  and  $V_o$ - $SnO_2$ / $TiO_2$  at -0.2 V determined by Nessler's reagent.

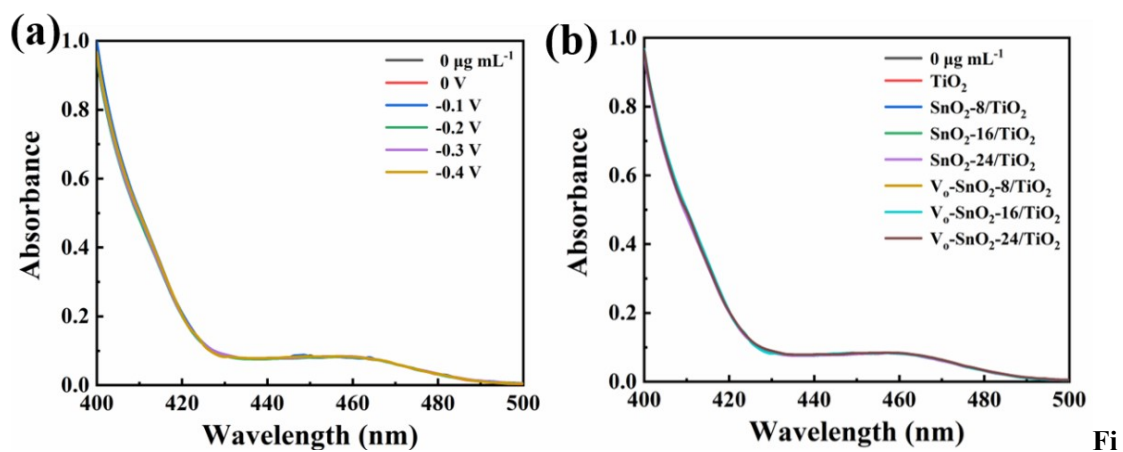

**g. S7** Ultraviolet-visible absorption spectra of (a)  $V_o\text{-SnO}_2\text{-16/TiO}_2$  at different potentials and (b)  $\text{TiO}_2$ ,  $\text{SnO}_2/\text{TiO}_2$  and  $V_o\text{-SnO}_2/\text{TiO}_2$  at  $-0.2$  V determined by Watt-Chrisp method.

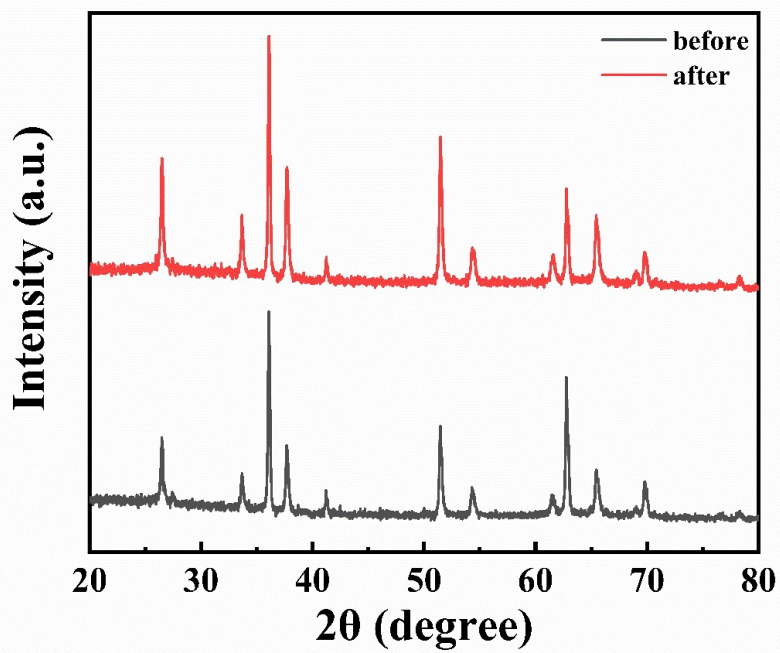

Fig.S8 XRD pattern of  $V_o\text{-SnO}_2/\text{TiO}_2$  before and after 5 nitrogen fixation cycles.

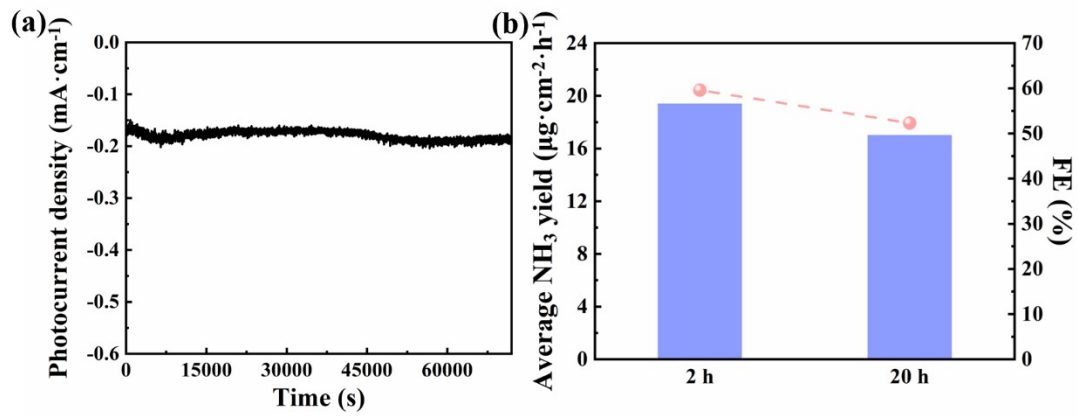

**Fig. S9** (a) Chronoamperometry curve of V<sub>o</sub>-SnO<sub>2</sub>-16/TiO<sub>2</sub> electrolysis for 20 h at -0.2 V potential;

(b) Ammonia yield and Faraday efficiency of electrolysis for 2 h and 20 h.

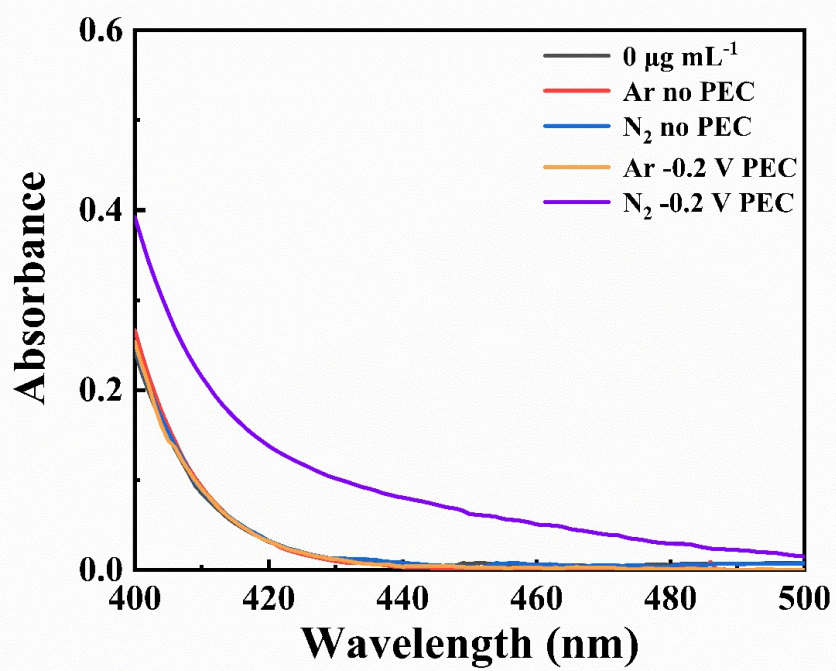

**Fig. S10** Ultraviolet -visible absorption spectra of  $V_o\text{-SnO}_2\text{-16/TiO}_2$  before and after electrolysis under different atmospheres.

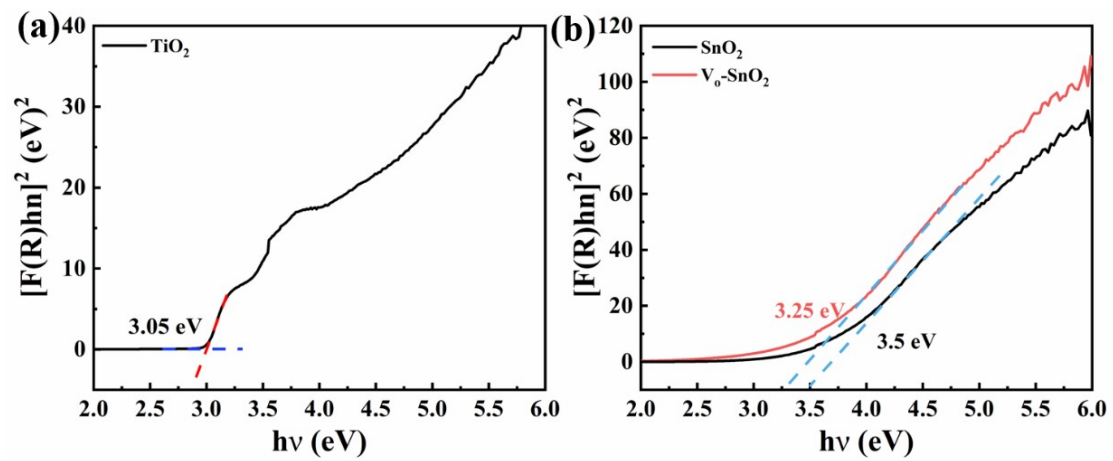

**Fig. S11** The band gap of (a)  $\text{TiO}_2$  nanorods and (b)  $\text{SnO}_2$  and  $\text{V}_o\text{-SnO}_2$  quantum dots.

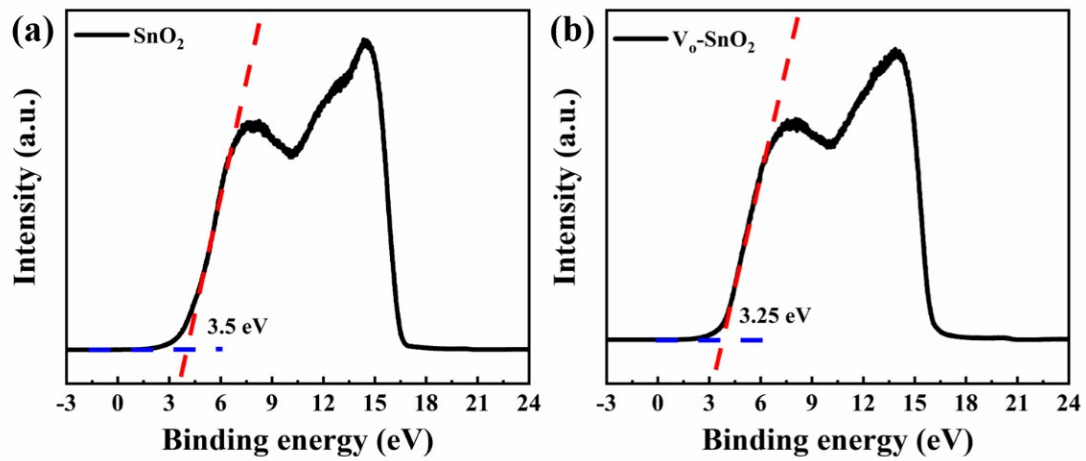

**Fig. S12** UPS spectrum of (a) SnO<sub>2</sub> quantum dots, (b) V<sub>0</sub>-SnO<sub>2</sub> quantum dots.

## References

- 1 N. Gao, H. M. Yang, D. Dong, D. Y. Dou, Y. J. Liu, W. J. Zhou, F. F. Gao, C. Nan, Z. H. Liang and D. H. Yang, *J. Colloid. Interf. Sci.*, 2022, **611**, 294-305.
- 2 H. M. Yang, C. Nan, N. Gao, W. J. Zhou, F. F. Gao, D. Dong, D. Y. Dou, Y. J. Liu, Z. H. Liang and D. H. Yang, *Electrochim. Acta*, 2022, **430**, 141086.
- 3 Y. J. Bai, H. Y. Bai, K. G. Qu, F. G. Wang, P. Guan, D. B. Xu, W. Q. Fan, W. D. Shi, *Chem. Eng. J.*, 2019, **362**, 349-356.
- 4 B. Wang, L. Yao, G. Q. Xu, X. Y. Zhang, D. W. Wang, X. Shu, J. Lv and Y. C. Wu, *ACS Appl. Mater. Interfaces*, 2020, **12**, 20376-20382.
- 5 M. Ali, F. L. Zhou, K. Chen, C. Kotzur, C. L. Xiao, L. Bourgeois, X. Y. Zhang and D. R. Macfarlane, *Nat. Commun.*, 2016, **7**, 11335.
- 6 C. C. Li, T. Wang, Z. J. Zhao, W. M. Yang, J. F. Li, A. Li, Z. L. Yang, G. A. Ozin and J. Gong, *Angew. Chem. Int. Ed.*, 2018, **57**, 5278-5282.
- 7 C. Lee, H. Kim and Y. J. Jang, *ACS Appl. Energy Mater.*, 2022, **5**, 11018-11024.
